# Supplementary material for: Resensitising proteasome inhibitor-resistant myeloma with sphingosine kinase 2 inhibition
Source: PubMed Central journal article supplement — Neoplasia. 2021 Nov 23;24(1):1–11. doi: 10.1016/j.neo.2021.11.009 (PMC8626806; doi:10.1016/j.neo.2021.11.009), 2021-11-23
Supplement: mmc4.pdf [file mmc4.pdf]

## **SUPPLEMENTARY DATA FOR:**

### **Resensitising proteasome inhibitor-resistant myeloma with sphingosine kinase 2 inhibition**

Melissa K. Bennett<sup>1</sup>, Manjun Li<sup>1</sup>, Melinda N. Tea<sup>1</sup>, Melissa R. Pitman<sup>1,2</sup>, John Toubia<sup>1,3</sup>, Paul P.-S. Wang<sup>1,3</sup>, Dovile Anderson<sup>4</sup>, Darren J. Creek<sup>4</sup>, Robert Z. Orłowski<sup>5</sup>, Briony L. Gliddon<sup>1</sup>, Jason A. Powell<sup>1,6</sup>, Craig T. Wallington-Beddoe<sup>1,6,7,8,\*</sup> and Stuart M. Pitson<sup>1,2,6,\*</sup>

<sup>1</sup> Centre for Cancer Biology, University of South Australia and SA Pathology, Bradley Building, North Tce, Adelaide SA, 5000, Australia;

<sup>2</sup> School of Biological Sciences, University of Adelaide, Adelaide SA, 5000, Australia

<sup>3</sup> ACRF Cancer Genomics Facility, Centre for Cancer Biology, SA Pathology, Adelaide, South Australia, 5000, Australia;

<sup>4</sup> Drug Delivery, Disposition and Dynamics, Monash Institute of Pharmaceutical Sciences, Monash University, Parkville, Victoria, Australia

<sup>5</sup> Department of Lymphoma and Myeloma, The University of Texas M.D. Anderson Cancer Center, Houston, TX 77030, USA;

<sup>6</sup> Adelaide Medical School, University of Adelaide, Adelaide SA, 5000, Australia;

<sup>7</sup> College of Medicine and Public Health, Flinders University, Bedford Park SA, 5042, Australia;

<sup>8</sup> Flinders Medical Centre, Bedford Park SA, 5042, Australia

\* Authors for correspondence:

Stuart M Pitson, Centre for Cancer Biology, University of South Australia, North Terrace, Adelaide, 5000, Australia; email: stuart.pitson@unisa.edu.au; Tel: +618 8302 7832

Craig T. Wallington-Beddoe, College of Medicine and Public Health, Flinders University, Bedford Park SA, 5042, Australia; email: craig.wallingtonbeddoe@flinders.edu.au; Tel: +618 8204 2831

Supplementary Figure 1

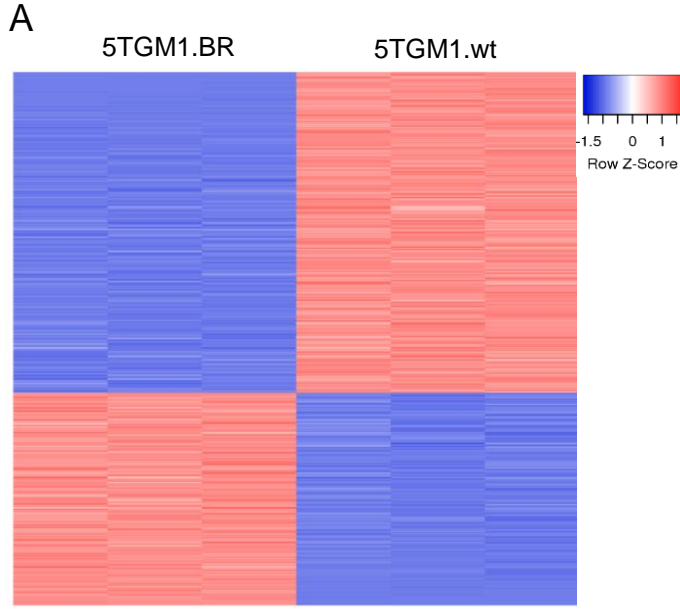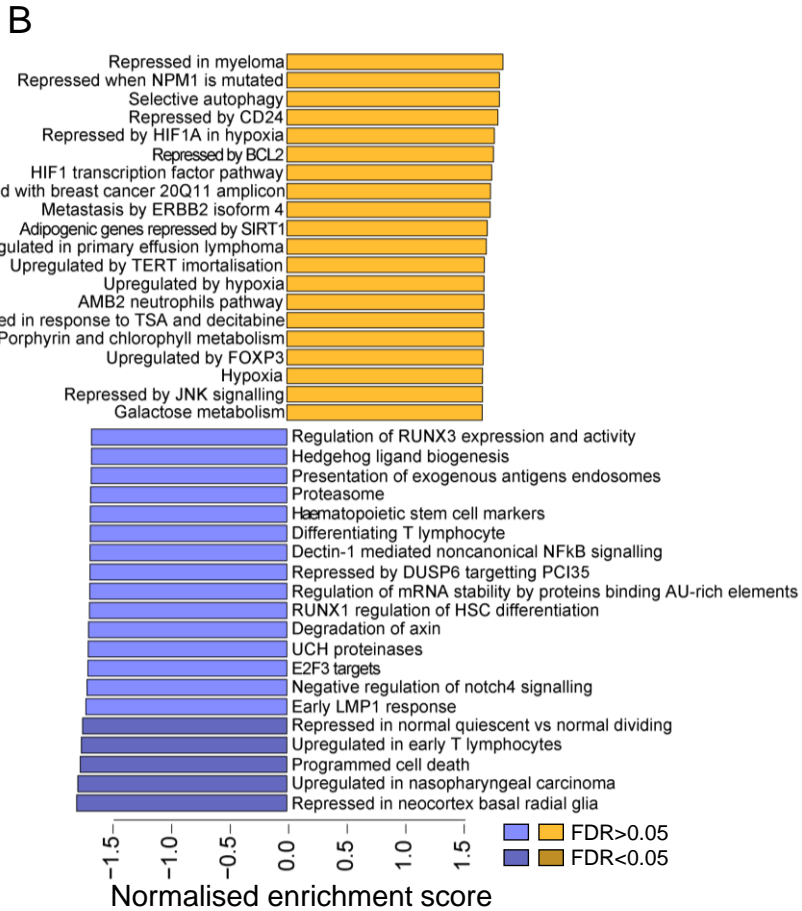

C

| Upregulated                               |       |         |             | Downregulated                                                                |        |         |             |
|-------------------------------------------|-------|---------|-------------|------------------------------------------------------------------------------|--------|---------|-------------|
| Name                                      | NES   | P-value | FDR q-value | Name                                                                         | NES    | P-value | FDR q-value |
| Boylan Multiple myeloma C D down          | 1.846 | 0.000   | 0.060       | Florio Neocortex basal radial glia down                                      | -1.796 | 0.000   | 0.015       |
| Mullighan NPM1 mutated signature down     | 1.817 | 0.000   | 0.077       | Sengupta Nasopharyngeal carcinoma up                                         | -1.785 | 0.000   | 0.012       |
| Reactome Selective autophagy              | 1.817 | 0.000   | 0.052       | Reactome Programmed cell death                                               | -1.766 | 0.000   | 0.027       |
| Sagiv CD24 targets down                   | 1.803 | 0.000   | 0.052       | Lee Early T lymphocyte up                                                    | -1.755 | 0.000   | 0.029       |
| Gross Hypoxia via HIF1A down              | 1.772 | 0.000   | 0.091       | Graham Normal quiescent vs normal dividing down                              | -1.754 | 0.000   | 0.036       |
| Vanasse BCL2 targets down                 | 1.766 | 0.000   | 0.092       | Dirmeier LMP1 response early                                                 | -1.716 | 0.000   | 0.068       |
| PID HIF1 transcription factor pathway     | 1.750 | 0.003   | 0.114       | Reactome Negative regulation of Notch4 signalling                            | -1.706 | 0.000   | 0.077       |
| Nikolsky Breast cancer 20Q11 amplicon     | 1.740 | 0.000   | 0.126       | Kong E2F3 targets                                                            | -1.698 | 0.000   | 0.089       |
| Pedersen Metastasis by ERBB2 isoform 4    | 1.738 | 0.002   | 0.118       | Reactome UCH proteinases                                                     | -1.697 | 0.000   | 0.081       |
| Wang Adipogenic genes repressed by SIRT1  | 1.714 | 0.006   | 0.182       | Reactome Degradation of axin                                                 | -1.694 | 0.003   | 0.079       |
| Klein Primary effusion lymphoma up        | 1.705 | 0.004   | 0.198       | Reactome RUNX1 regulates genes involved in differentiation of HSCs           | -1.686 | 0.000   | 0.088       |
| Kang Immortalised by TERT up              | 1.688 | 0.000   | 0.254       | Reactome Regulation of mRNA stability by proteins that bind AU-rich elements | -1.683 | 0.000   | 0.087       |
| Elvidge Hypoxia up                        | 1.686 | 0.000   | 0.240       | Furukawa DUSP6 targets PCI35 down                                            | -1.682 | 0.000   | 0.082       |
| PID AMB2 neutrophils pathway              | 1.686 | 0.002   | 0.224       | Reactome Dectin-1 mediated noncanonical NFkB signalling                      | -1.680 | 0.000   | 0.080       |
| Kim response to TSA and decitabine up     | 1.684 | 0.002   | 0.219       | Lee Differentiating T lymphocyte                                             | -1.680 | 0.000   | 0.076       |
| KEGG Porphyrin and chlorophyll metabolism | 1.683 | 0.002   | 0.209       | Park Haematopoietic stem cell markers                                        | -1.678 | 0.000   | 0.075       |
| Marson FOXP3 targets stimulated up        | 1.678 | 0.011   | 0.215       | KEGG Proteasome                                                              | -1.676 | 0.000   | 0.073       |
| Qi Hypoxia                                | 1.673 | 0.003   | 0.220       | Reactome Cross presentation of soluble exogenous antigens endosomes          | -1.673 | 0.002   | 0.076       |
| Han JNK signalling down                   | 1.673 | 0.006   | 0.209       | Reactome Hedgehog ligand binding                                             | -1.670 | 0.002   | 0.079       |
| KEGG galactose metabolism                 | 1.671 | 0.002   | 0.208       | Reactome Regulation of RUNX3 expression and activity                         | -1.669 | 0.002   | 0.077       |

D

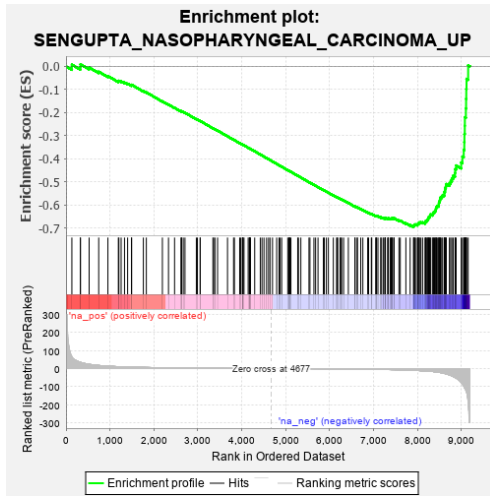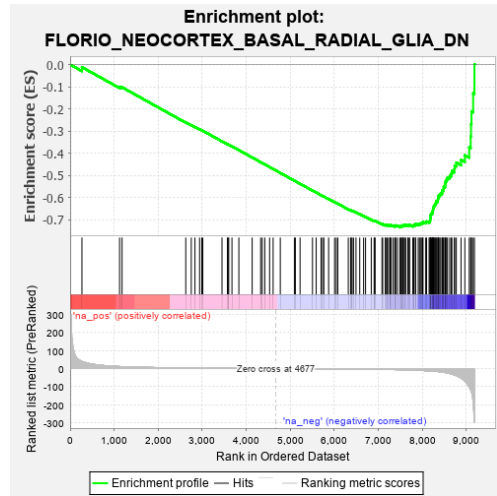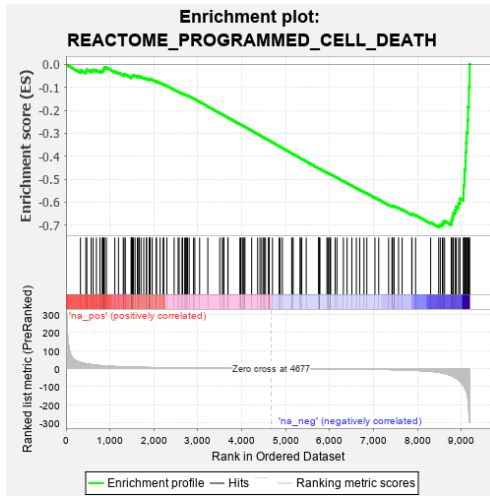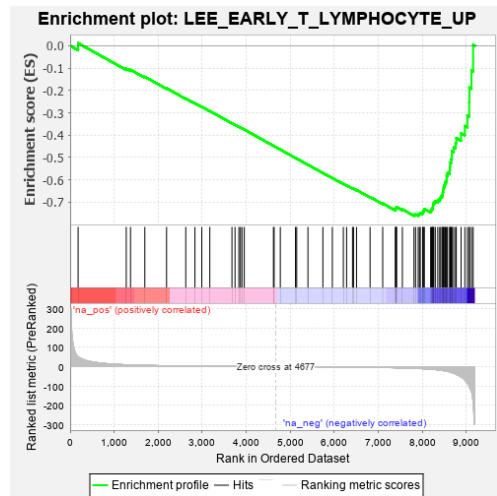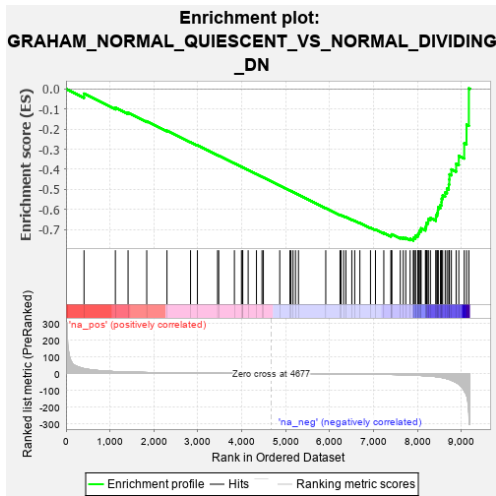

Supplementary Figure 1: **RNAseq and gene set enrichment analysis of genes differentially expressed in 5TGM1.BR compared to 5TGM1.wt.** **A)** RNA-sequencing was performed on 5TGM1.wt and 5TGM1.BR cells, with heat map showing changes in gene expression of at least two-fold between these cells. **B)** Gene set enrichment analysis of differentially regulated genes, with the top twenty upregulated and downregulated pathways shown, with further detail shown in panel **(C)**, including the full name of the gene set according to the C2 collection of the Molecular Signature Database, the normalised enrichment score (NES), the nominal p-value, and the false discovery rate (FDR) q-value. **D)** Enrichment plots for gene sets with a false discovery rate of  $<0.05$ .

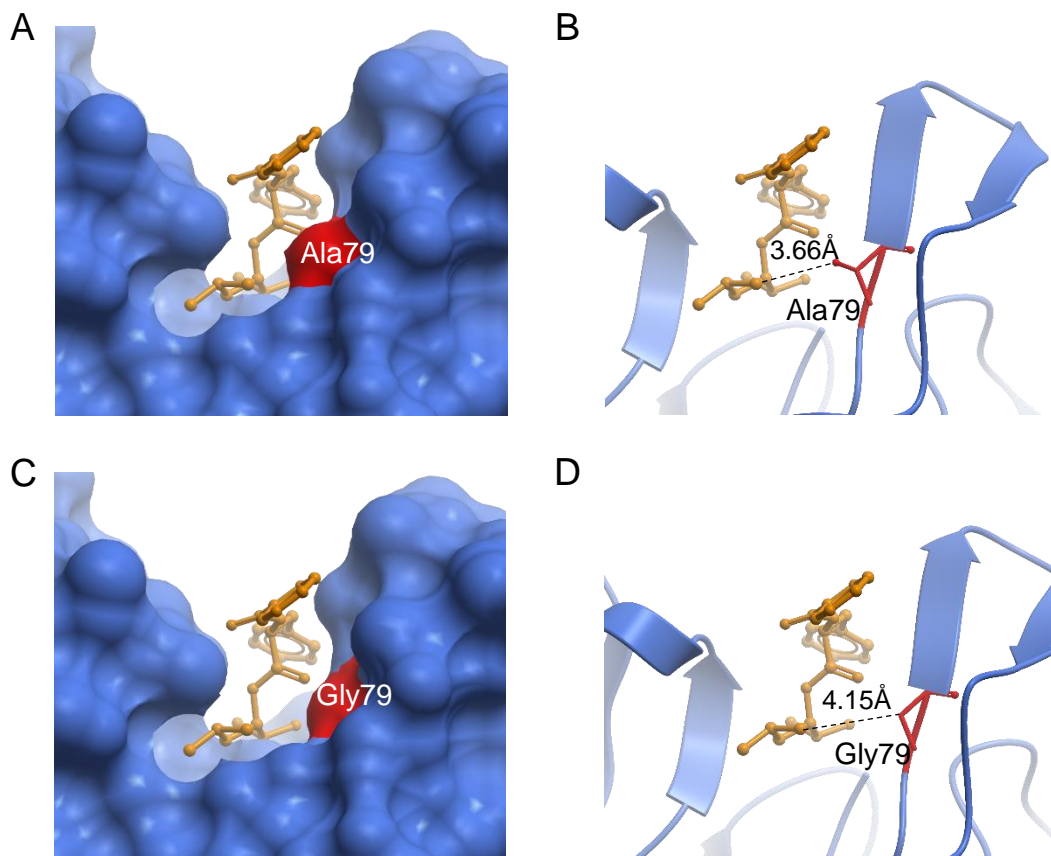

Supplementary Figure 2: **Mutation of Ala79 alters hydrophobic interactions with bortezomib.** The chymotrypsin binding pocket of human PSMB5 crystallised with Bortezomib were analysed using ICM-Pro. PSMB5 crystallised with bortezomib (orange sticks, pdb code: 5lf3\_K) is represented in surface view (A) or ribbon view (B). Ala79 was mutated to Glycine *in silico* (C,D). Ala79 or the mutated Gly79 are highlighted in red. Distances between the conserved methyl moiety of the inhibitors and side-chain methyl of Ala or alpha carbon of Gly79 were measured and depicted as dashed lines. The Ala79→Gly mutation is not predicted to alter hydrogen bonding interactions in the pocket.

Supplementary Figure 3

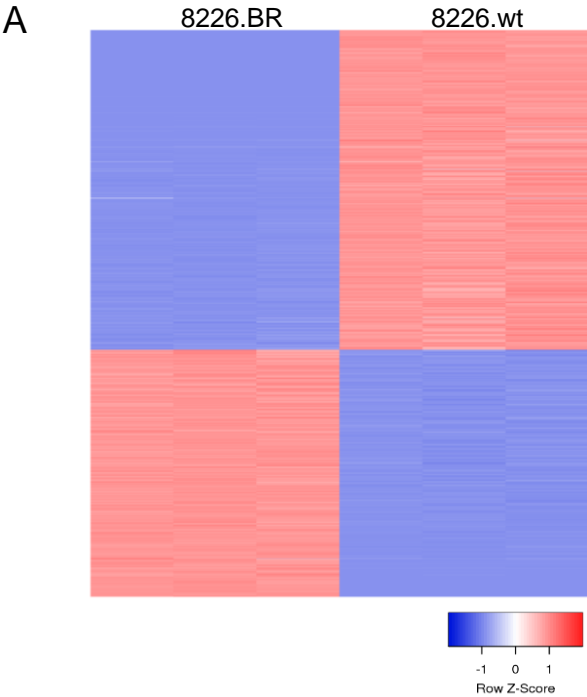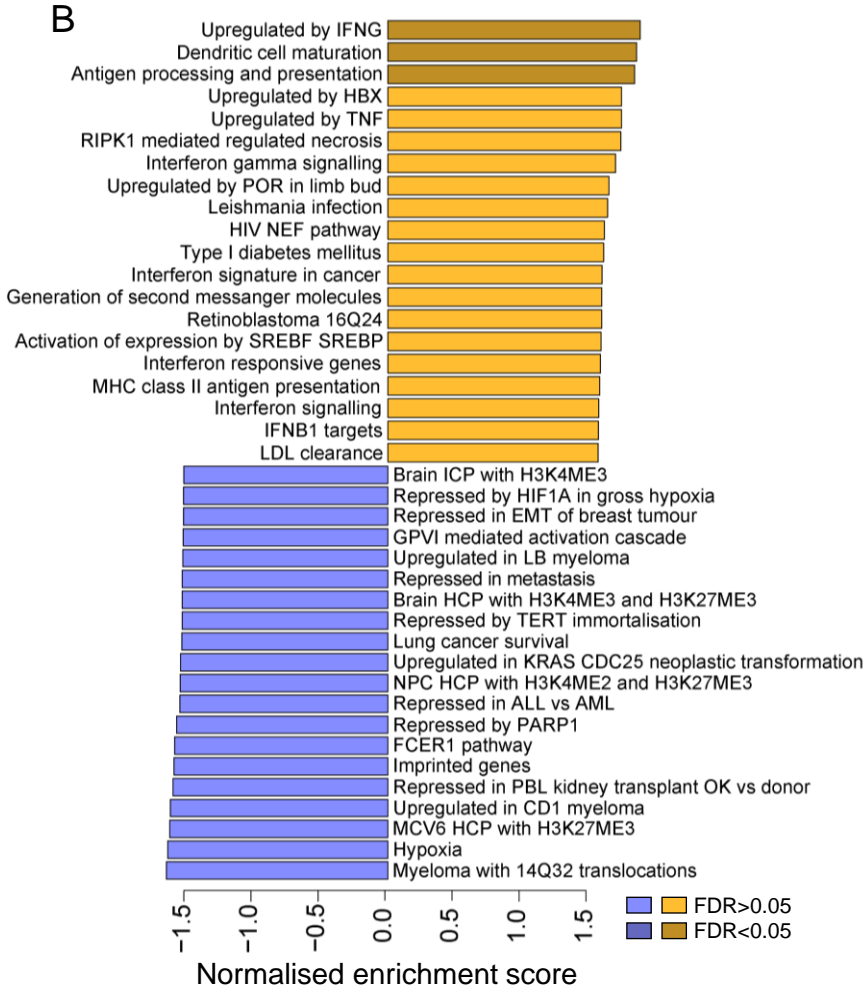

C

| Upregulated                                           |       |         |             | Downregulated                                       |        |         |             |
|-------------------------------------------------------|-------|---------|-------------|-----------------------------------------------------|--------|---------|-------------|
| Name                                                  | NES   | P-value | FDR q-value | Name                                                | NES    | P-value | FDR q-value |
| Sana Response to IFNG up                              | 1.882 | 0.000   | 0.025       | Mattioli Multiple myeloma with 14Q32 translocations | -1.653 | 0.000   | 0.239       |
| Lindstedt Dendritic cell maturation A                 | 1.855 | 0.000   | 0.025       | Harris hypoxia                                      | -1.643 | 0.000   | 0.157       |
| KEGG Antigen processing and presentation              | 1.841 | 0.000   | 0.021       | Mikkelsen MCV6 HCP with H3K27ME3                    | -1.629 | 0.000   | 0.165       |
| Wu HBX Targets 2 up                                   | 1.743 | 0.000   | 0.141       | Zhan Multiple myeloma CD1 up                        | -1.624 | 0.001   | 0.149       |
| Sana TNF signalling up                                | 1.742 | 0.000   | 0.114       | Flechner PBL kidney transplant OK vs donor down     | -1.604 | 0.001   | 0.225       |
| Reactome RIPK1 mediated regulated necrosis            | 1.738 | 0.007   | 0.106       | Brideau Imprinted genes                             | -1.596 | 0.002   | 0.238       |
| Reactome Interferon gamma signalling                  | 1.698 | 0.000   | 0.197       | 0.000P0.543ID FCER1 pathway                         | -1.592 | 0.003   | 0.223       |
| Schmidt POR targets in limb bud up                    | 1.649 | 0.000   | 0.416       | Simbulan PARP1 targets down                         | -1.577 | 0.006   | 0.302       |
| KEGG Leishmania infection                             | 1.638 | 0.004   | 0.435       | Golub ALL vs AML down                               | -1.552 | 0.003   | 0.513       |
| PID HIV NEF pathway                                   | 1.615 | 0.009   | 0.557       | Meissner NPC HCP with H3K4ME3 and H3K27ME3          | -1.550 | 0.003   | 0.484       |
| KEGG Type I diabetes mellitus                         | 1.610 | 0.012   | 0.547       | Chiaradonna Neoplastic transformation KRAS CDC25 up | -1.548 | 0.000   | 0.468       |
| Einav Interferon signature in cancer                  | 1.598 | 0.009   | 0.584       | Chen Lung cancer survival                           | -1.539 | 0.002   | 0.526       |
| Reactome Generation of second messenger molecules     | 1.596 | 0.005   | 0.561       | Lindvall Immortalised by TERT down                  | -1.536 | 0.006   | 0.523       |
| Gratias Retinoblastoma 16Q24                          | 1.594 | 0.013   | 0.530       | Meissner Brain HCP with H3K4ME3 and H3K27ME3        | -1.535 | 0.000   | 0.491       |
| Reactome Activation of gene expression by SREBF SREBP | 1.590 | 0.004   | 0.521       | Jaeger Metastasis down                              | -1.535 | 0.004   | 0.464       |
| Browne Interferon responsive genes                    | 1.586 | 0.004   | 0.516       | Zhan Multiple myeloma LB up                         | -1.531 | 0.004   | 0.469       |
| Reactome MHC class II antigen presentation            | 1.580 | 0.000   | 0.525       | Reactome GPVI mediated activation cascade           | -1.527 | 0.006   | 0.486       |
| Reactome Interferon signalling                        | 1.573 | 0.000   | 0.543       | Hollern EMT breast tumour down                      | -1.525 | 0.004   | 0.475       |
| Hecker IFNB1 targets                                  | 1.570 | 0.011   | 0.534       | Gross Hypoxia via HIF1A down                        | -1.524 | 0.003   | 0.457       |
| Reactome LDL clearance                                | 1.569 | 0.012   | 0.512       | Meissner Brain ICP with H3K4ME3                     | -1.523 | 0.005   | 0.448       |



**D**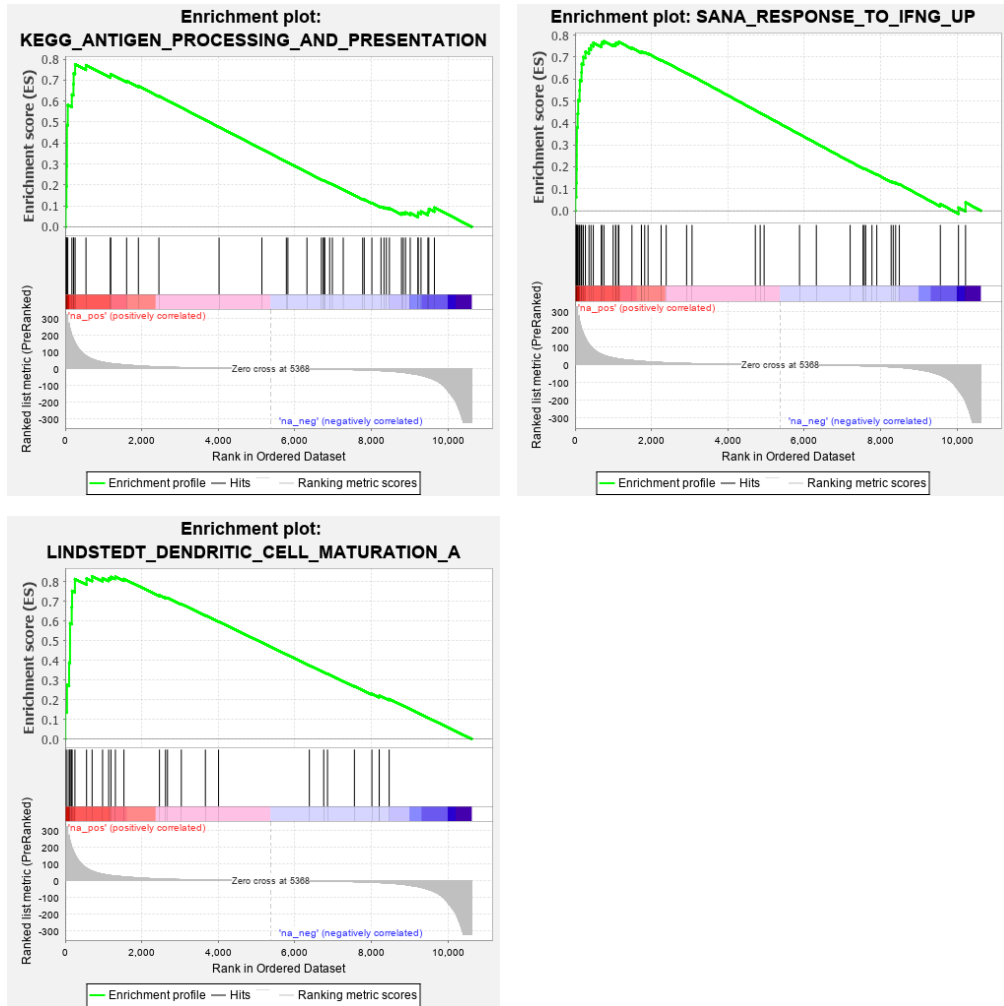

Supplementary Figure 3: **RNaseq and gene set enrichment analysis of genes differentially expressed in 8226.BR compared to 8226.wt.** **A)** RNA-sequencing was performed on 8226.wt and 8226.BR cells, with the heat map showing changes in gene expression of at least two-fold between these cells. **B)** Gene set enrichment analysis of differentially regulated genes, with the top twenty upregulated and downregulated pathways shown, with further details shown in panel (C), including the full name of the gene set according to the C2 collection of the Molecular Signature Database, the normalised enrichment score (NES), the nominal p-value, and the false discovery rate (FDR) q-value. **D)** Enrichment plots for gene sets with a false discovery rate of  $<0.05$ .

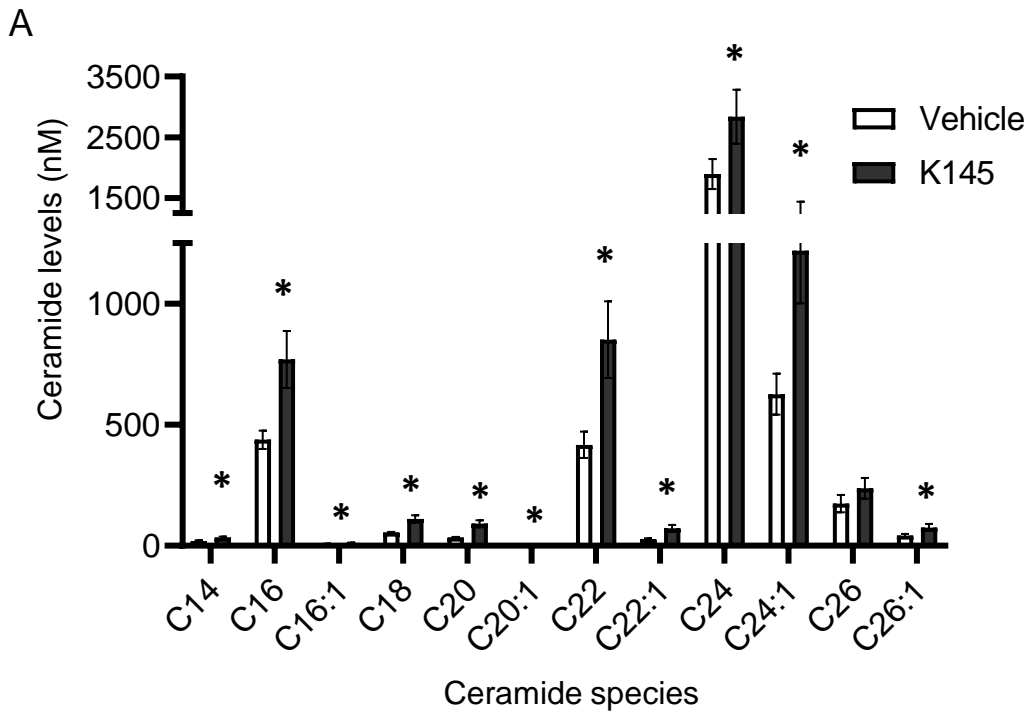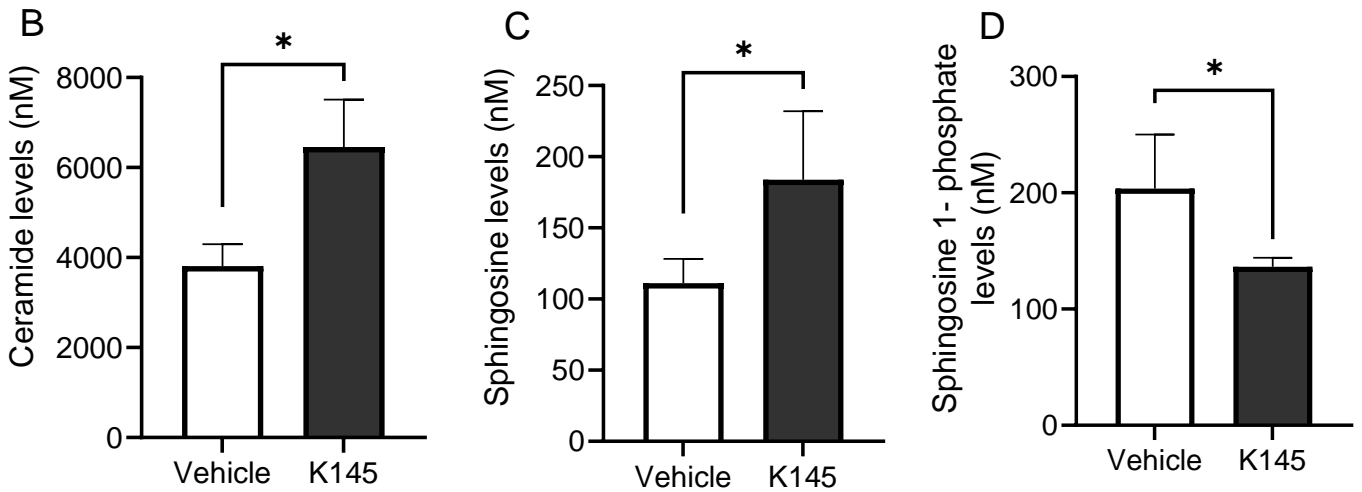

Supplementary Figure 4: **Treatment with K145 increases ceramide and sphingosine, and decreases sphingosine 1 phosphate in bortezomib-resistant myeloma cells.** 5TGM1.BR cells were treated with vehicle or 8  $\mu$ M K145 for 6h in quadruplicate, and sphingolipidomic analysis performed. **(A)** Levels of individual ceramides species within each sample, with species delineated by length of the N-linked acyl chain. **(B)** Total ceramide levels within each sample. **(C)** Sphingosine (C18) levels within each sample. **(D)** Sphingosine 1-phosphate (C18) levels within each sample. \*  $p < 0.05$

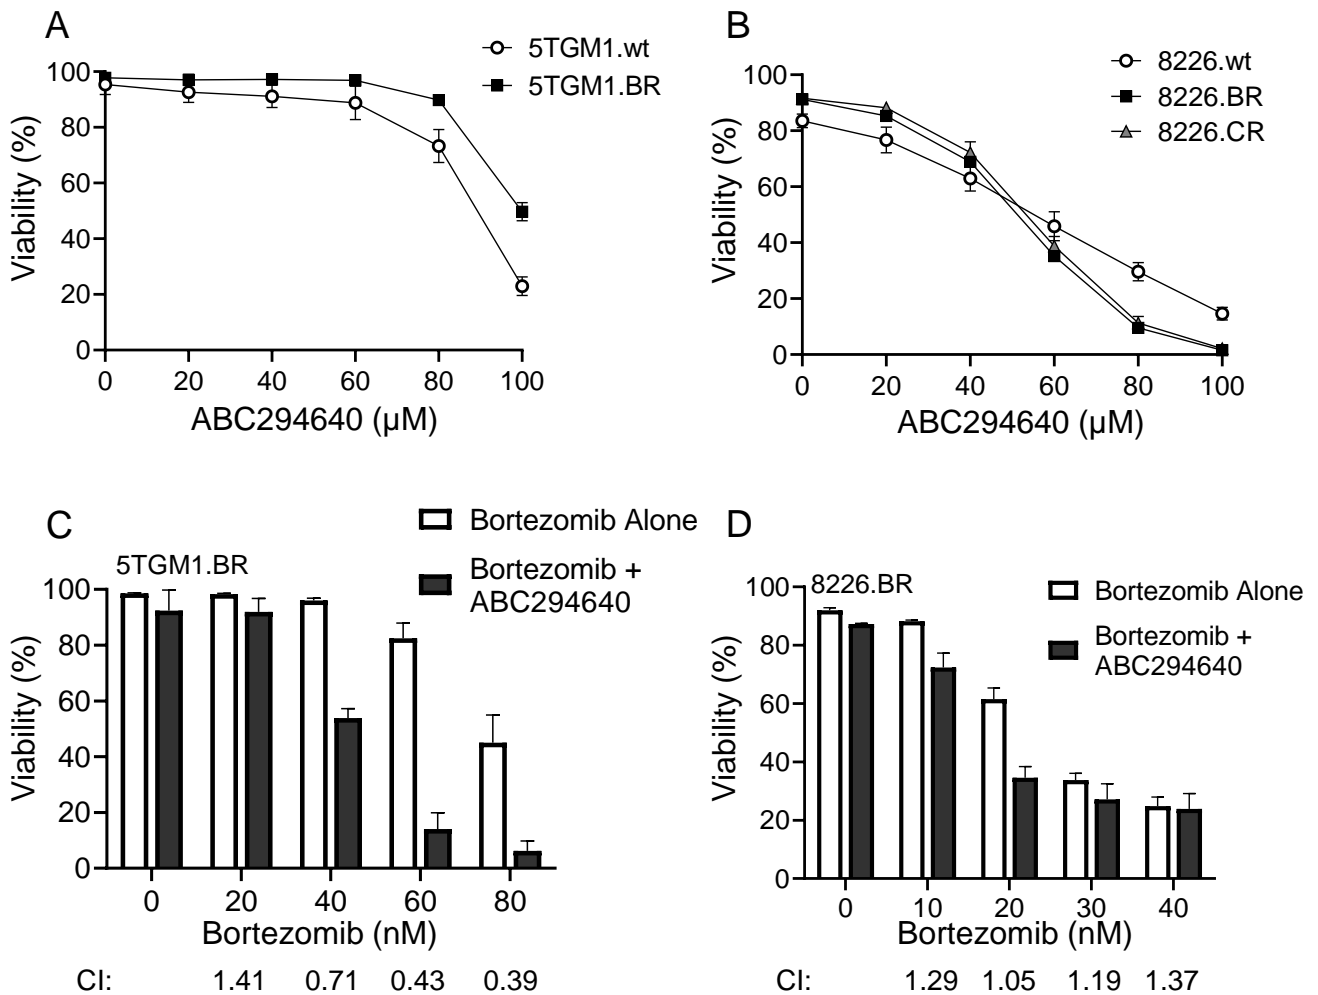

Supplementary Figure 5: **A second SK2 inhibitor ABC294640 largely mimics the effect of K145 on proteasome inhibitor resistant myeloma** **A**) 5TGM1.wt and 5TGM1.BR cells were treated with increasing concentrations of ABC294640 for 48h, and viability was then assessed by flow cytometry using Annexin-V and PI staining. The  $EC_{50}$  for 5TGM1.wt cells was  $90.7\mu\text{M}$  (95% CI  $88.5\mu\text{M}$ - $93\mu\text{M}$ ), and the  $EC_{50}$  for 5TGM1.BR cells was  $>100\mu\text{M}$  (predicted to be  $100.4\mu\text{M}$ ). **B**) 8226.wt, 8226.BR and 8226.CR cells were treated with increasing concentrations of ABC294640 for 48h, and then viability was assessed by flow cytometry, with  $EC_{50}$ 's of  $66.6\mu\text{M}$  (95% CI  $59.9\mu\text{M}$ - $72.5\mu\text{M}$ ),  $55\mu\text{M}$  (95% CI  $53.1\mu\text{M}$ - $56.8\mu\text{M}$ ), and  $56.2\mu\text{M}$  (95% CI  $53.8\mu\text{M}$ - $58.7\mu\text{M}$ ) respectively **C**) 5TGM1.BR cells were treated with increasing concentrations of bortezomib with and without  $50\mu\text{M}$  ABC294640 for 48h, and then cell viability was assessed by flow cytometry. **D**) 8226.BR cells were treated with increasing concentrations of bortezomib with and without  $20\mu\text{M}$  ABC294640 for 48h, and then cell viability was assessed by flow cytometry. All data shown represent the mean  $\pm$  SD of three independent experiments. Combination index (CI) values were calculated using CompuSyn, where a CI of  $<1$  indicates synergy.

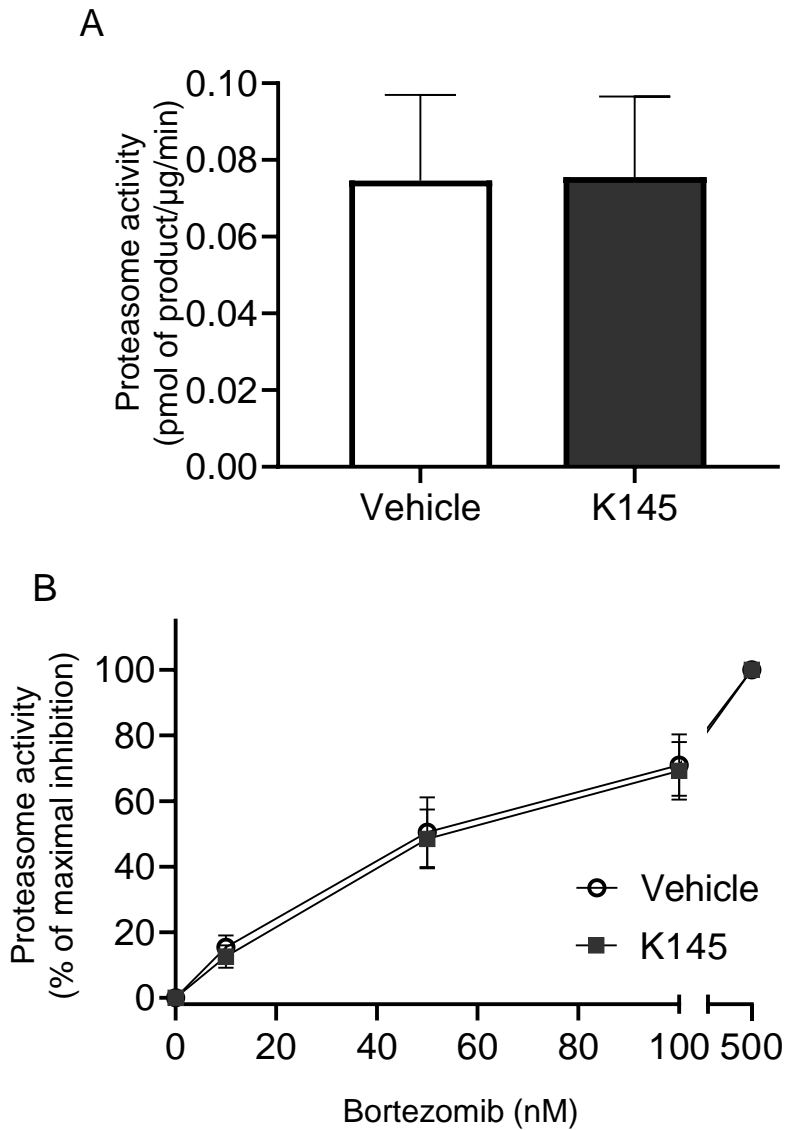

Supplementary Figure 6: **K145 pre-treatment does not change proteasome activity.** **A)** 5TGM1.BR cells were treated with vehicle or 8µM K145 for 6h. Cell lysates were collected, and chymotrypsin-like activity of the proteasome measured by cleavage of the fluorescent substrate suc-LLVY-AMC. Activity is shown as pmol of suc-LLVY-AMC cleaved per µg protein per min. Data shown represents mean ± SD of three independent experiments. **B)** Proteasome activity measured as in A) with increasing concentrations of bortezomib. Activity shown as a percent of maximal inhibition normalised to control, and is the mean ± SD of three independent experiments.

Supplementary Figure 7

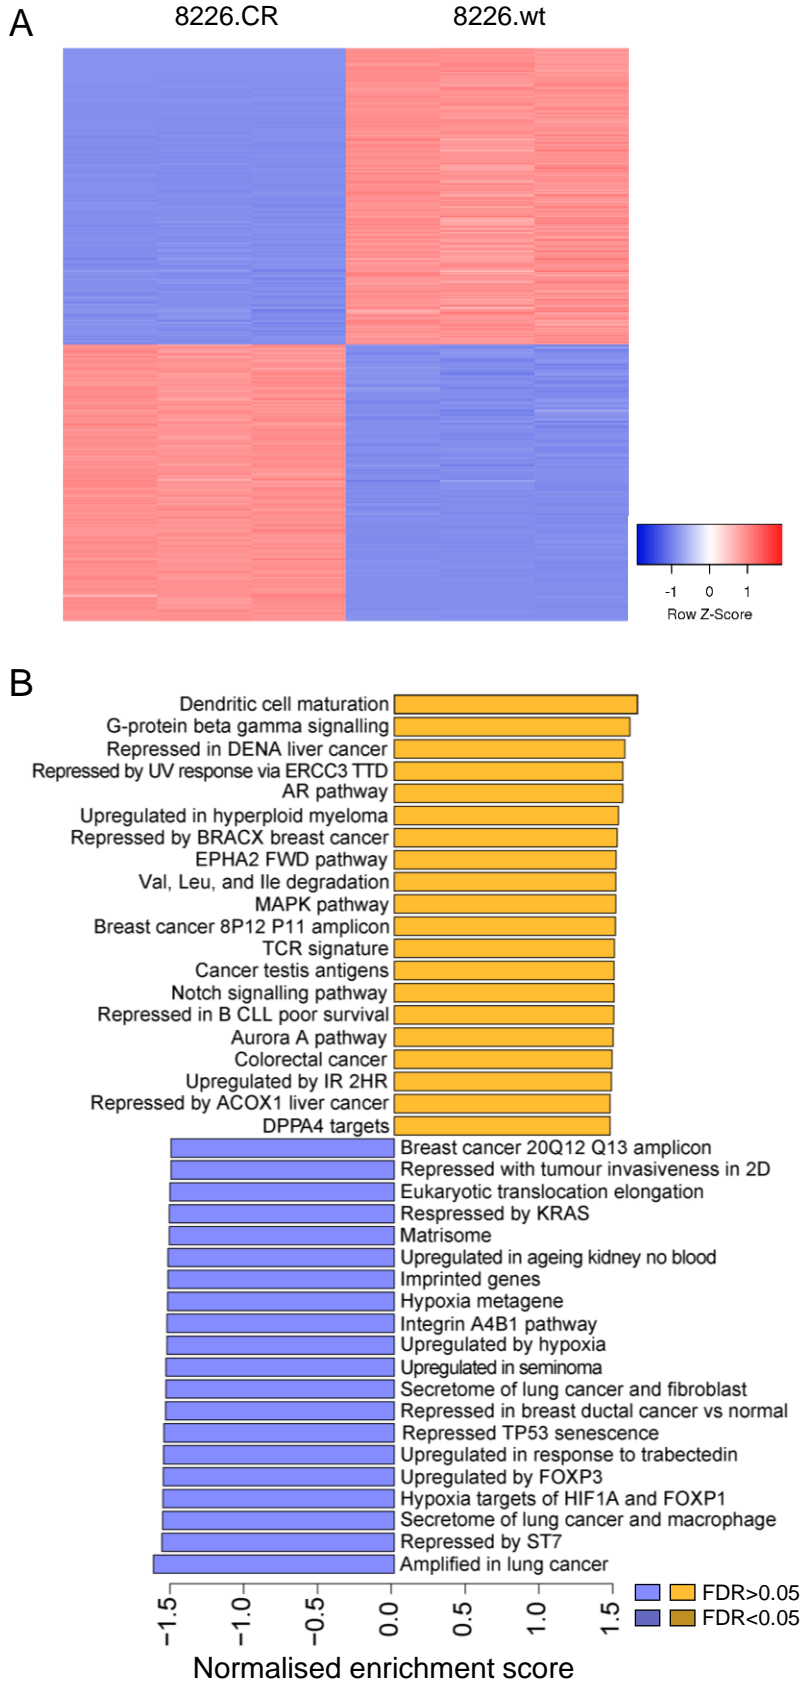

C

| Upregulated                                      |       |         |             | Downregulated                                             |        |         |             |
|--------------------------------------------------|-------|---------|-------------|-----------------------------------------------------------|--------|---------|-------------|
| Name                                             | NES   | P-value | FDR q-value | Name                                                      | NES    | P-value | FDR q-value |
| Lindstedt Dendritic cell maturation A            | 1.647 | 0.007   | 1.0         | Li Amplified in lung cancer                               | -1.632 | 0.000   | 0.523       |
| Reactome G protein beta gamma signalling         | 1.595 | 0.000   | 1.0         | Hooi ST7 targets down                                     | -1.574 | 0.005   | 1.0         |
| Lee Liver cancer DENA down                       | 1.561 | 0.002   | 1.0         | Zhong Secretome of lung cancer and macrophage             | -1.570 | 0.002   | 1.0         |
| Dacosta UV response via ERCC3 TTD down           | 1.547 | 0.005   | 1.0         | Qi Hypoxia targets of HIF1A and FOXA2                     | -1.569 | 0.002   | 0.870       |
| PID AR pathway                                   | 1.547 | 0.010   | 1.0         | Delpeuch FOXO3 targets up                                 | -1.565 | 0.007   | 0.768       |
| Zhan Multiple myeloma HP up                      | 1.518 | 0.011   | 1.0         | Martinez Response to trabectedin up                       | -1.564 | 0.003   | 0.658       |
| Hedenfalk Breast cancer BRACX down               | 1.508 | 0.011   | 1.0         | Tang Senescence TP53 targets down                         | -1.561 | 0.007   | 0.595       |
| PID EPHA2 FWD pathway                            | 1.501 | 0.015   | 1.0         | Turashvili Breast ductal carcinoma vs lobular normal down | -1.549 | 0.002   | 0.691       |
| KEGG Valine, leucine, and isoleucine degradation | 1.501 | 0.024   | 1.0         | Zhong Secretome of lung cancer and fibroblast             | -1.548 | 0.003   | 0.638       |
| Biocarta MAPK pathway                            | 1.501 | 0.008   | 1.0         | Korkola Seminoma up                                       | -1.546 | 0.002   | 0.599       |
| Nikolsky Breast cancer 8P12 P11 amplicon         | 1.498 | 0.034   | 1.0         | Mense Hypoxia up                                          | -1.540 | 0.008   | 0.625       |
| Reactome TCR signalling                          | 1.490 | 0.013   | 1.0         | PID Integrin A4B1 pathway                                 | -1.539 | 0.004   | 0.585       |
| Yokoe Cancer testis antigens                     | 1.489 | 0.026   | 1.0         | Winter Hypoxia metagene                                   | -1.535 | 0.003   | 0.598       |
| KEGG Notch signalling pathway                    | 1.488 | 0.019   | 1.0         | Brideau Imprinted genes                                   | -1.533 | 0.002   | 0.573       |
| Huttmann B CLL poor survival down                | 1.487 | 0.025   | 1.0         | Rodwell Ageing kidney no blood up                         | -1.532 | 0.002   | 0.544       |
| PID Aurora A pathway                             | 1.483 | 0.024   | 1.0         | Naba Matrisome                                            | -1.525 | 0.000   | 0.601       |
| KEGG Colorectal cancer                           | 1.476 | 0.034   | 1.0         | Sweet KRAS targets down                                   | -1.524 | 0.007   | 0.580       |
| Smirnov Response to IR 2HR up                    | 1.470 | 0.026   | 1.0         | Reactome Eukaryotic translation elongation                | -1.519 | 0.010   | 0.604       |
| Lee Liver cancer ACOX1 down                      | 1.462 | 0.028   | 1.0         | Rizki Tumour invasiveness 2D down                         | -1.514 | 0.009   | 0.638       |
| Madan DPPA4 targets                              | 1.462 | 0.036   | 1.0         | Nikolsky Breast cancer 20Q12 Q13 amplicon                 | -1.514 | 0.005   | 0.606       |

Supplementary Figure 7: **RNaseq and gene set enrichment analysis of genes differentially expressed in 8226.CR compared to 8226.wt.** **A)** RNA-sequencing was performed on drug-naïve RPMI-8226 (8226.wt) cells and carfilzomib-resistant RPMI-8226 (8226.CR) cells, with the heat map showing changes in gene expression of at least two-fold between these cell line. **B)** Gene set enrichment analysis of differentially regulated genes in 8226.CR cells compared to 8226.wt cells was conducted, with the top twenty upregulated and downregulated pathways shown, with further details shown in panel **(C)**, including the full name of the gene set according to the C2 collection of the Molecular Signature Database, the normalised enrichment score (NES), the nominal p-value, and the false discovery rate (FDR) q-value.

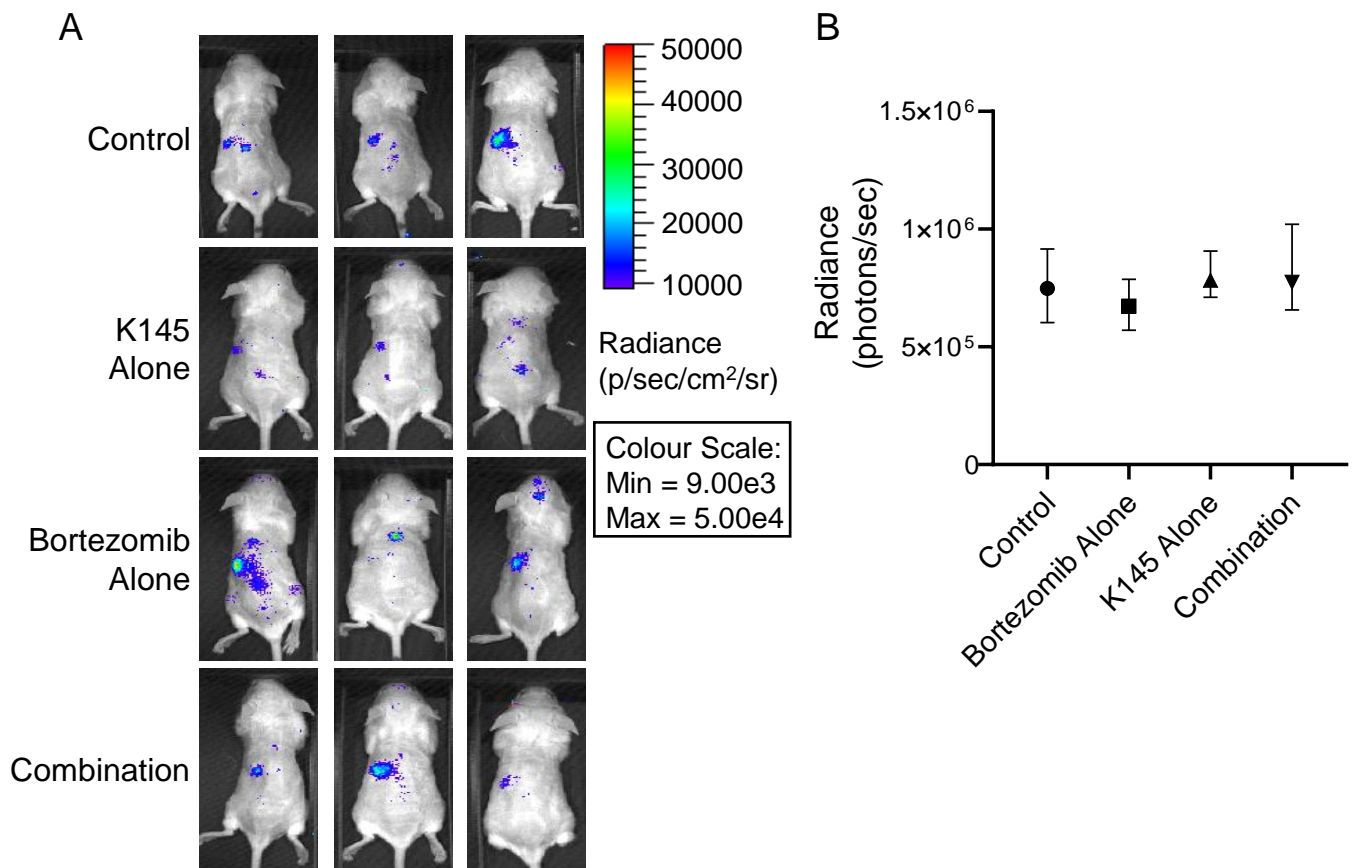

Supplementary Figure 8: **Disease burden in mouse myeloma model prior to treatment.** **A)** The same representative mice from Figure 6, showing disease burden directly before treatment (14 days post cell injection) at a lower bioluminescence scale. **B)** The median disease burden immediately before treatment (14 days post cell injection) in each treatment group after randomisation,  $\pm$  95% confidence interval.



Supplementary Table 1: **Genes differentially regulated in 5TGM1.BR cells compared to 5TGM1.wt cells.** RNAseq was performed on the 5TGM1.BR and 5TGM1.wt cells, with all genes up or downregulated by at least two-fold in 5TGM1.BR cells compared to 5TGM1.wt cells shown. Fold change in 5TGM1.BR cells compared to 5TGM1.wt cells shown in log<sub>2</sub> format, along with the p-value and false discovery rate for this fold change. Included at the bottom of the table is the fold change for *PSMB5*, *PSMB6*, and *PSMB7*, none of which appeared to be differentially regulated.

See attached excel table; Bennett et al\_Supplementary Table 1

Supplementary Table 2: **Genes likely homozygously mutated in the 5TGM1.BR cells**

**5TGM1.wt cells.** Variant analysis was conducted on the RNAseq data from the 5TGM1.BR and 5TGM1.wt cells, with the genes that were homozygous wildtype compared to the reference genome in the 5TGM1.wt cells and likely homozygous mutant in the 5TGM1.BR cells shown here. Reference genome used was C57BL\_6NJ. Synonymous mutations were excluded

| Gene name | Protein name                                          | Gene alteration and location | Protein Alteration                                      |
|-----------|-------------------------------------------------------|------------------------------|---------------------------------------------------------|
| Psm5      | Proteasome subunit beta 5                             | G→C<br>14:54616784           | Ala→Gly, position 79                                    |
| Kat7      | Lysine acetyltransferase 7                            | A→G<br>11:95284027           | Splice donor variant, leads to inclusion of pseudo-exon |
| Rhobtb2   | Rho related BTB domain containing 2                   | C→A<br>14:69786154           | Alteration in 3' UTR                                    |
| Fbxl3     | F-box and leucine rich repeat protein 3               | C→G<br>14:103099308          | Alteration in 5' UTR                                    |
| Cpeb2     | Cytoplasmic polyadenylation element binding protein 2 | A→C<br>5:43278669            | Ser→Arg, position 771                                   |
| Bcat1     | Branched chain amino acid transaminase 1              | A→C<br>6:145039454           | Val→Gly, position 87                                    |
| Zbtb33    | Zinc finger and BTB domain containing 33              | G→A<br>X:38193612            | Gly→Ser, position 446                                   |

Supplementary Table 3: **Genes differentially regulated in 8226.BR cells compared to 8226.wt cells.** RNAseq was performed on the 8226.BR and 8226.wt cells, with all genes up or downregulated by at least two-fold in 8226.BR cells compared to 8226.wt cells shown. Fold change in 8226.BR cells compared to 8226.wt cells shown in log<sub>2</sub> format, along with the p-value and false discovery rate for this fold change.

See attached excel spreadsheet; Bennett et al\_Supplementary Table 3

Supplementary Table 4: **Genes likely homozygously mutated in 8226.BR cells compared to 8226.wt.** Genes found in variant analysis of RNAseq data from 8226.wt and 8226.BR to be significant (Fisher exact test p-value<0.01), extremely rare (minor allele frequency<0.05%), and entirely matching the reference genome (hg19) in 8226.wt cells and entirely alternative to the reference genome in 8226.BR cells. Synonymous mutations were excluded.

| Gene name | Protein name                                  | Gene alteration and location | Protein Alteration    |
|-----------|-----------------------------------------------|------------------------------|-----------------------|
| THEM4     | Thioesterase superfamily member 4             | G→A<br>1:151847037           | Alteration in 3' UTR  |
| RNF180    | Ring finger protein 180                       | G→C<br>5:63666570            | Alteration in 3' UTR  |
| DPY19L1P1 | Dpy-19-like 1 pseudogene 1                    | G→A<br>7:32793722            | Intron variant        |
| PEX2      | Peroxisomal biogenesis factor 2               | A→T<br>8:77895795            | Leu→His, position 207 |
| MKI67     | Marker of proliferation Ki-67                 | C→G<br>10:129913426          | Glu→Gln, position 771 |
| STIP1     | Stress-induced phosphoprotein 1               | G→A<br>11:63965149           | Intron variant        |
| CADM1     | Cell adhesion molecule 1                      | C→G<br>11:115045831          | Alteration in 3' UTR  |
| TIGD7     | Tigger transposable element derived protein 7 | G→C<br>16:3349704            | Ser→Cys, position 304 |
| DGCR2     | DiGeorge syndrome critical region protein 2   | C→G<br>22:19028685           | Asp→His, position 428 |

Supplementary Table 5: **Genes differentially regulated in 8226.CR cells compared to 8226.wt cells.** RNAseq was performed on the 8226.CR and 8226.wt cells, with all genes up or downregulated by at least two-fold in 8226.CR cells compared to 8226.wt cells shown. Fold change in 8226.CR cells compared to 8226.wt cells shown in log<sub>2</sub> format, along with the p-value and false discovery rate for this fold change.

See attached excel spreadsheet; Bennett et al\_Supplementary Table 5

Supplementary Table 6: **Genes likely homozygously mutated in 8226.CR cells compared to 8226.wt.** Genes found in variant analysis of RNAseq data from 8226.wt and 8226.CR to be significant (Fisher exact test p-value<0.01), extremely rare (minor allele frequency<0.05%), and entirely matching the reference genome (hg19) in 8226.wt cells and entirely alternative to the reference genome in 8226.CR cells. Synonymous mutations were excluded.

| Gene name | Protein name                                 | Gene alteration and location | Protein Alteration    |
|-----------|----------------------------------------------|------------------------------|-----------------------|
| DPY19L1P1 | Dpy-19-like 1 pseudogene 1                   | G→A<br>7:32793722            | Intron variant        |
| ADAM8     | A disintegrin and metalloproteinase domain 8 | C→G<br>10:135081513          | Glu→Gln, position 725 |
| EMP2      | Epithelial membrane protein 2                | G→A<br>16:10625854           | Alteration in 3' UTR  |

**Supplementary Table 7: Genes up or downregulated in all proteasome-inhibitor resistant cell lines.**

As shown in Figure 4A, there were only 26 genes found to be up or downregulated in 5TGM1.BR, 8226.BR and 8226.CR compared to their drug-naïve controls. Both the human gene and the mouse analogue are given, along with the fold change in log2 format, the p-value and the false discovery rate for these genes in all three cell lines.

| Human gene | Mouse analogue | Fold change (log2) |         |         | P-value   |           |           | FDR       |           |           |
|------------|----------------|--------------------|---------|---------|-----------|-----------|-----------|-----------|-----------|-----------|
|            |                | 5TGM1.BR           | 8226.BR | 8226.CR | 5TGM1.BR  | 8226.BR   | 8226.CR   | 5TGM1.BR  | 8226.BR   | 8226.CR   |
| TMOD1      | Tmod1          | 2.683              | 4.552   | 1.297   | 1.61E-113 | 6.02E-146 | 1.51E-06  | 7.87E-112 | 7.35E-145 | 3.34E-06  |
| TEX19      | Tex19.2        | 1.030              | 1.476   | 2.303   | 1.66E-19  | 5.87E-51  | 6.97E-149 | 1.03E-18  | 3.17E-50  | 1.41E-147 |
| SEMA4F     | Sema4f         | 1.265              | 5.316   | 4.974   | 3.95E-13  | 1.56E-197 | 8.26E-169 | 1.67E-12  | 2.79E-196 | 1.86E-167 |
| PTPN22     | Ptpn22         | 2.873              | 3.711   | 3.697   | 0         | 0         | 0         | 0         | 0         | 0         |
| PLEKHG4    | Plekhhg4       | 1.147              | 2.124   | 1.911   | 1.89E-16  | 7.61E-101 | 3.69E-83  | 9.81E-16  | 6.89E-100 | 4.60E-82  |
| KSR1       | Ksr1           | 1.145              | 2.218   | 1.885   | 1.14E-35  | 4.29E-79  | 3.97E-58  | 1.30E-34  | 3.21E-78  | 3.81E-57  |
| HLA-DMB    | H2-DMb1        | 1.383              | 3.683   | 1.189   | 1.46E-153 | 3.75E-175 | 2.29E-12  | 1.22E-151 | 5.63E-174 | 7.30E-12  |
| DCLK2      | Dclk2          | 1.055              | 1.775   | 1.095   | 4.43E-72  | 6.47E-53  | 4.37E-20  | 1.19E-70  | 3.58E-52  | 1.95E-19  |
| CMYA5      | Cmya5          | 1.521              | 1.581   | 1.063   | 6.54E-55  | 2.26E-34  | 4.14E-16  | 1.26E-53  | 9.23E-34  | 1.57E-15  |
| ANKRD55    | Ankrd55        | 1.182              | 6.626   | 6.132   | 3.68E-53  | 0         | 0         | 6.68E-52  | 0         | 0         |
| TNS1       | Tns1           | -2.744             | -5.061  | -2.077  | 1.03E-56  | 7.79E-131 | 6.41E-51  | 2.07E-55  | 8.66E-130 | 5.65E-50  |
| TNNT1      | Tnnt1          | -1.532             | -6.762  | -4.995  | 3.38E-45  | 6.32E-184 | 2.54E-197 | 4.98E-44  | 1.02E-182 | 6.71E-196 |
| SLC2A3     | Slc2a3         | -2.529             | -4.154  | -4.420  | 4.47E-146 | 3.09E-268 | 0         | 3.44E-144 | 8.15E-267 | 0         |
| SLA        | Sla            | -1.468             | -8.976  | -1.937  | 1.40E-226 | 1.47E-318 | 1.46E-94  | 1.99E-224 | 5.07E-317 | 1.99E-93  |
| PIM2       | Pim2           | -1.263             | -1.289  | -1.429  | 1.89E-177 | 6.05E-127 | 5.19E-155 | 1.96E-175 | 6.57E-126 | 1.09E-153 |
| P2RY10     | P2ry10         | -4.506             | -3.849  | -3.712  | 1.27E-116 | 2.31E-115 | 1.48E-135 | 6.60E-115 | 2.32E-114 | 2.74E-134 |
| MYO10      | Myo10          | -1.181             | -14.617 | -4.497  | 1.30E-27  | 0         | 0         | 1.13E-26  | 0         | 0         |
| JAKMIP2    | Jakmip2        | -2.067             | -10.553 | -7.226  | 2.19E-53  | 0         | 0         | 4.02E-52  | 0         | 0         |
| IFITM1     | Ifitm2         | -1.296             | -2.926  | -4.746  | 1.07E-24  | 2.59E-154 | 4.7E-300  | 8.37E-24  | 3.38E-153 | 2.16E-298 |
| HIST1H2BD  | Hist3h2ba      | -1.003             | -1.535  | -1.472  | 4.80E-60  | 1.22E-24  | 9.08E-24  | 1.02E-58  | 4.02E-24  | 4.52E-23  |
| HIST1H1C   | Hist1h1c       | -1.237             | -1.315  | -2.188  | 6.33E-99  | 1.45E-47  | 6.13E-121 | 2.53E-97  | 7.43E-47  | 1.01E-119 |
| ESRP1      | Esrp1          | -1.457             | -10.397 | -1.343  | 1.96E-15  | 0         | 1.22E-80  | 9.63E-15  | 0         | 1.48E-79  |
| BMP1       | Bmp1           | -1.142             | -1.926  | -1.088  | 8.22E-93  | 5.61E-135 | 6.59E-56  | 2.98E-91  | 6.44E-134 | 6.16E-55  |
| ALDOC      | Aldoc          | -4.787             | -1.020  | -1.667  | 0         | 3.13E-54  | 1.26E-137 | 0         | 1.76E-53  | 2.36E-136 |
| ADAM11     | Adam11         | -3.229             | -1.960  | -2.774  | 4.92E-39  | 7.73E-50  | 2.55E-92  | 6.19E-38  | 4.1E-49   | 3.42E-91  |
| ACPP       | Acpp           | -1.702             | -1.831  | -2.470  | 6.13E-33  | 8.67E-73  | 9.15E-127 | 6.42E-32  | 6.09E-72  | 1.59E-125 |
